# Supplementary material
Source: Atypon-hosted journal article supplement (https://blackgold.org/Record/41582/DownloadSupplementalFile?fileId=60)
Supplement: DownloadSupplementalFile [file DownloadSupplementalFile]

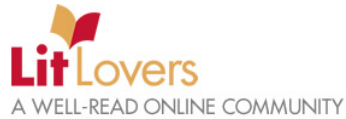

## Fountainhead (Rand)

---

[Summary](#) | [Author Bio](#) | [Book Reviews](#) | [Discussion Questions](#) | [Full Version](#) | [Print](#)

---

### Discussion Questions

Use our LitLovers Book Club Resources; they can help with discussions for any book:

- [How to Discuss a Book](#) (helpful discussion tips)
- [Generic Discussion Questions—Fiction and Nonfiction](#)
- [Read-Think-Talk](#) (a guided reading chart)

Also consider these LitLovers talking points to help get a discussion started for *The Fountainhead*:

1. Talk about the altruism v. selfishness, one of the novel's key issues. How do the characters (or Rand) turn those qualities on their heads?
2. Discuss the portrayal of women in the novel, specifically Dominique and Catherine. How do they compare to the novel's male characters?
3. Consider Roark's bombing of the Cortlandt Complex. Are we supposed to approve or disapprove his use of violence?
4. What are the differences between the Dean's philosophy and Roark's? Consider, for instance, how the Dean believes in traditional architecture and the desires of the client rather than innovation and artistic freedom.
5. Toohey and Roark are alike in that they are driven by the belief in adhering to one's principles. How do they differ?

*(Questions by LitLovers. Please feel free to use them, online or off, with attribution. Thanks.)*

[top of page \(summary\)](#)

---

[<< Prev](#) [Next](#)
